# Supplementary material for: A rapid procedure for bacterial identification and antimicrobial susceptibility testing directly from positive blood cultures
Source: Royal Society of Chemistry journal article supplement (doi:10.1039/d1an01210j), 2021-11-15
Supplement: d1an01210j1.pdf [file d1an01210j1.pdf]

## Supporting Information

### **A Rapid Procedure for Bacterial Identification and Antimicrobial Susceptibility Testing Directly from Positive Blood Cultures**

Bo Sun,<sup>a, b</sup> Xixiong Kang,<sup>b</sup> Lu Lan,<sup>c</sup> Rui Li,<sup>c</sup> Chen Chen,<sup>a</sup> Weifeng Zhang,<sup>a</sup> Shipei He,<sup>a</sup> Chenxi Zhang,<sup>b</sup> Yubo Fan,<sup>a, d</sup> Pu Wang,<sup>\*a</sup> Guanghui Zheng,<sup>\*b</sup> and Weili Hong<sup>\*a</sup>

<sup>a</sup> Institute of Medical Photonics, Beijing Advanced Innovation Center for Biomedical Engineering, School of Biological Science and Medical Engineering, Beihang University, Beijing, China

<sup>b</sup> Laboratory Diagnosis Center, Beijing Tiantan Hospital, Capital Medical University, Beijing, China

<sup>c</sup> Vibronix Inc., West Lafayette, IN, USA

<sup>d</sup> School of Medical Science and Engineering, Beihang University, Beijing, China.

\* Corresponding authors: weilihong@buaa.edu; zgh999@yeah.net; 10318@buaa.edu.cn

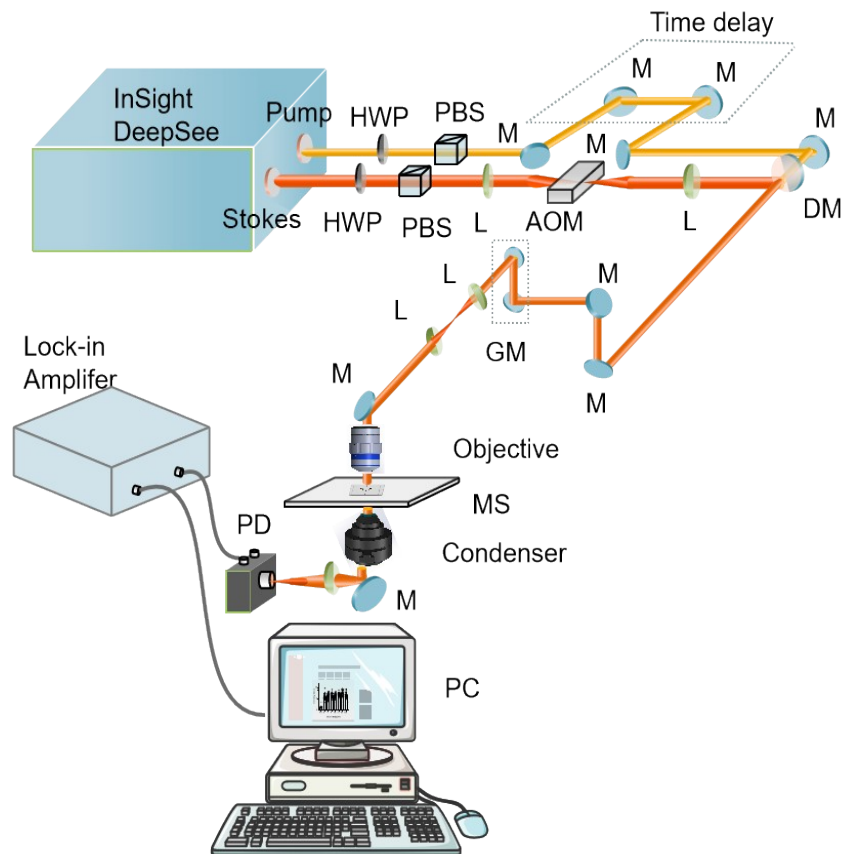

**Figure S1.** Schematic setup of SRS imaging system. HWP, half wave plate; PBS, polarizing beam splitter; L, lens; M, mirror; AOM, acousto-optic modulator; DM, dichroic mirror; GM, galvo mirror; MS, motorized stage; PD, photodiode.

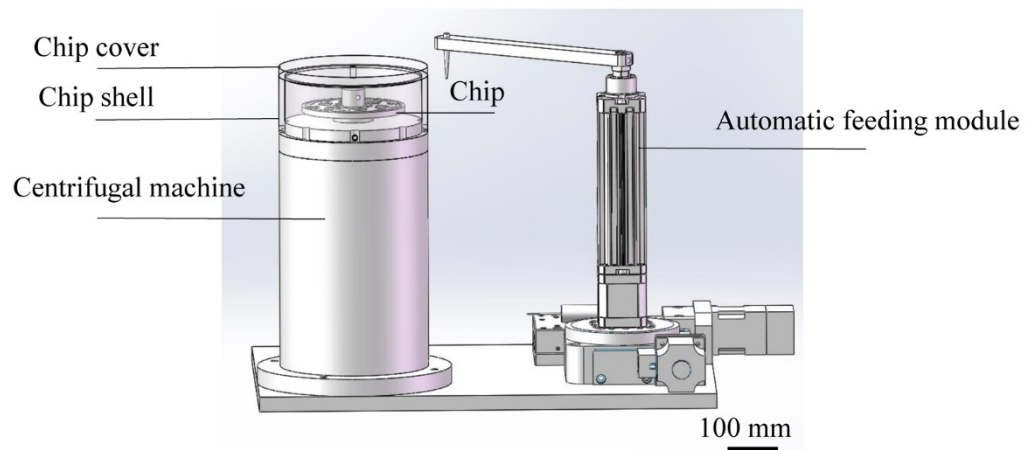

**Figure S2.** Schematic of the semi-automatic centrifugation device.
